# Supplementary material
Source: publisher figshare collection journal article supplement (https://gsajournals.figshare.com/ndownloader/files/21237549)
Supplement: Supplementary file 1 [file 21237549]

## Sheet: Figure 1
Panel 1 B	n
15°	105
20°	88
21°	86
22°	82
23°	78
24°	89
25°	106
26°	92
Panel 1D
20°	88
25°	106

## Sheet: Figure 2
Panel 2A	n
N2 20°	93
N2 25°	108
Lin-39(n709) 20°	90
Lin-39 (n709) 25°	95
mab-5(e1239) 20°	107
mab-5(e1239) 25°	82
egl-5(n945) 20°	100
egl-5(n945) 25°	78
Panel 2B
Wt	120
mab-5(e1751gf)	40
Panel 2C
Wt	59
mab-5(e1751gf)	40
Panel 2D
20°	29
25°	28

## Sheet: Figure 3
Panel 3A	n
N2 20°	93
N2 25°	108
egl-20(hu105) 20°	73
egl-20(hu105) 25°	78
lin-17(n671) 20°	29
lin-17(n671) 25°	75
bar-1(ga80) 20°	120
bar-1(ga80) 25°	120
Panel 3B
Wt - Control	40
Wt - bar-1 RNAi	97
mab-5(e1751gf) - control RNAi	55
mab-5(e1751gf) - bar-1 RNAi	66
Panel 3C
20°	30
25°	51

## Sheet: Figure 4
panel 4B	n
20°	32
25°	20
Panel 4C
WT 20°	120
WT 25°	120
egl-18(ga97) 20°	120
egl-18(ga97) 25°	120
Panel 4E and F
V6a pair 20°	22
V6a pair 25°	29
V6p pair 20°	20
V6p pair 25°	31

## Sheet: Figure 5 
Strain	n
N2	120
Ju2007	120
Ju2519	120
Ju775	120
CB4856	120
XZ1516	120

## Sheet: Figure S1
panel A	n
Eggs	184
Pre-L2	76
Panel B
L3	119
L4	116
Panel E
Wt	106
aff-1(tm2214)	44

## Sheet: Figure S3
panel A	n
WT 20°	105
WT 25°	105
mab-5(e1239) 20°	93
mab-5(e1239) 25°	108
Panel B
mab-5(e1751gf)	10
